# Supplementary material
Source: publisher site journal article supplement (https://www.dovepress.com/article/516329)
Supplement: Supplementary file 1 [file 516329%20Revised%20Supplementary%20Material.pdf]

Supplementary Figure 1 Schematic diagram of CT-guided percutaneous lung nodule localization

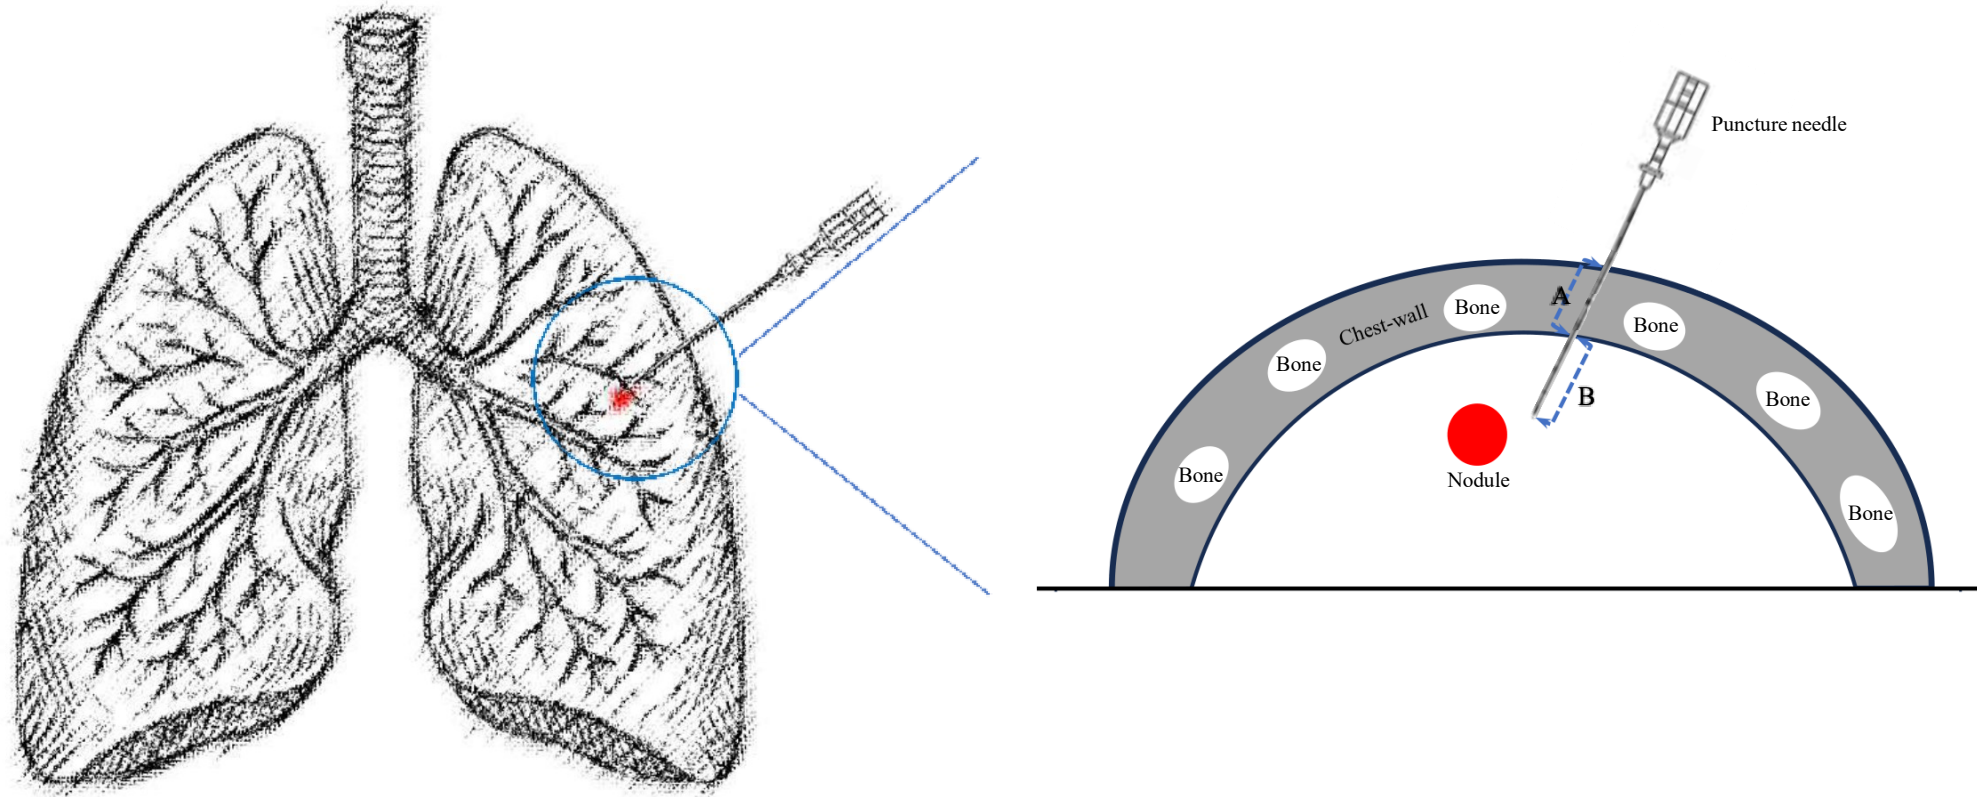

**Supplementary Figure 2**

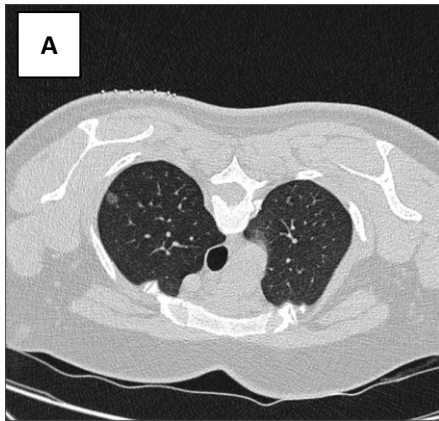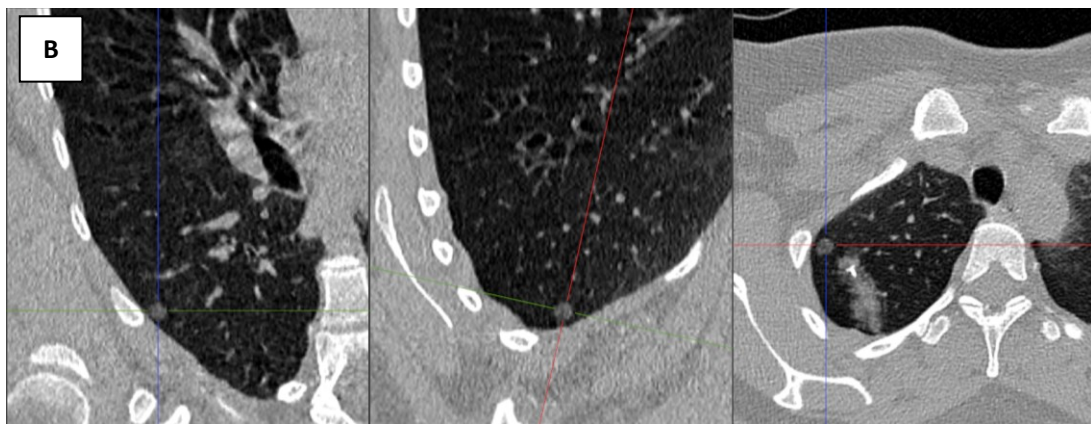

**(A):** Preoperative CT image (prior to lung nodule localization).

**(B):** Immediate postoperative CT image (following CT-PLNL procedure).

# Model 1 ROC (Bootstrap)

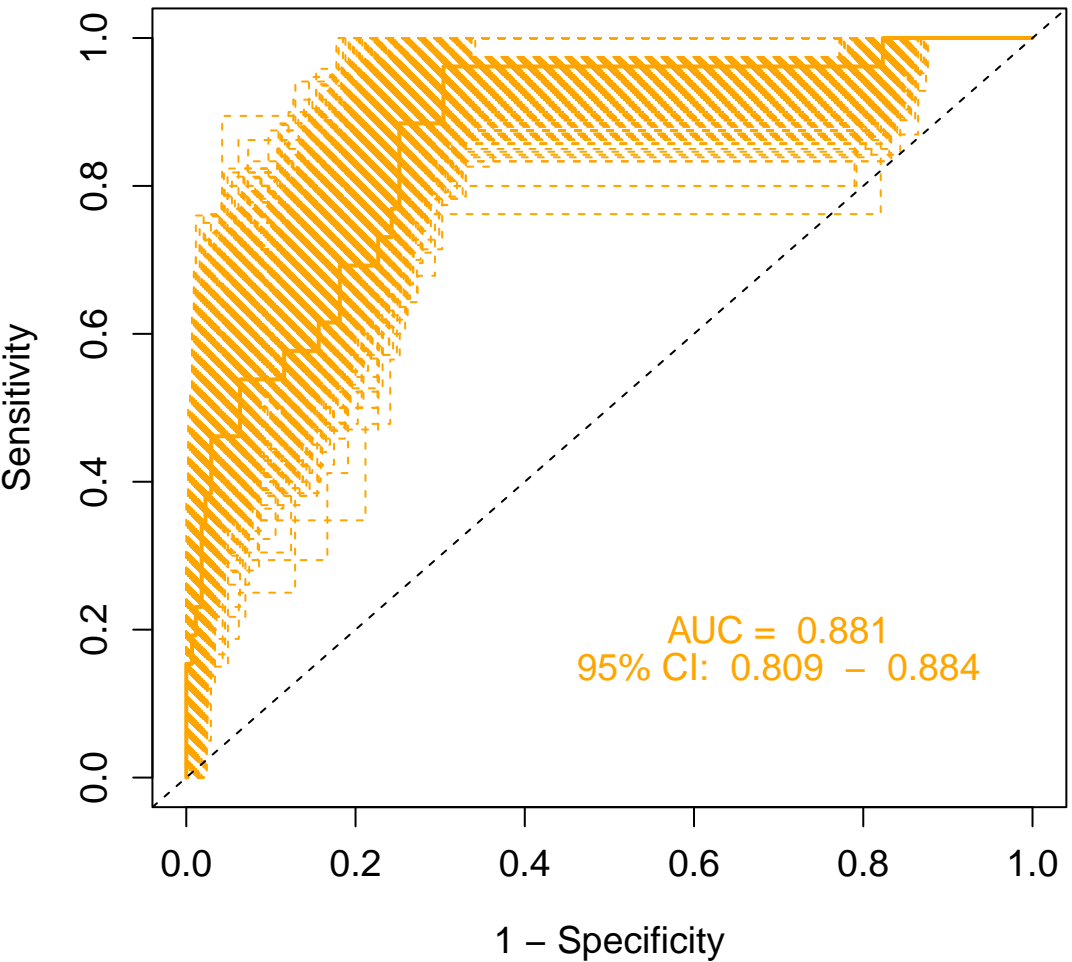

# Model 2 ROC (Bootstrap)

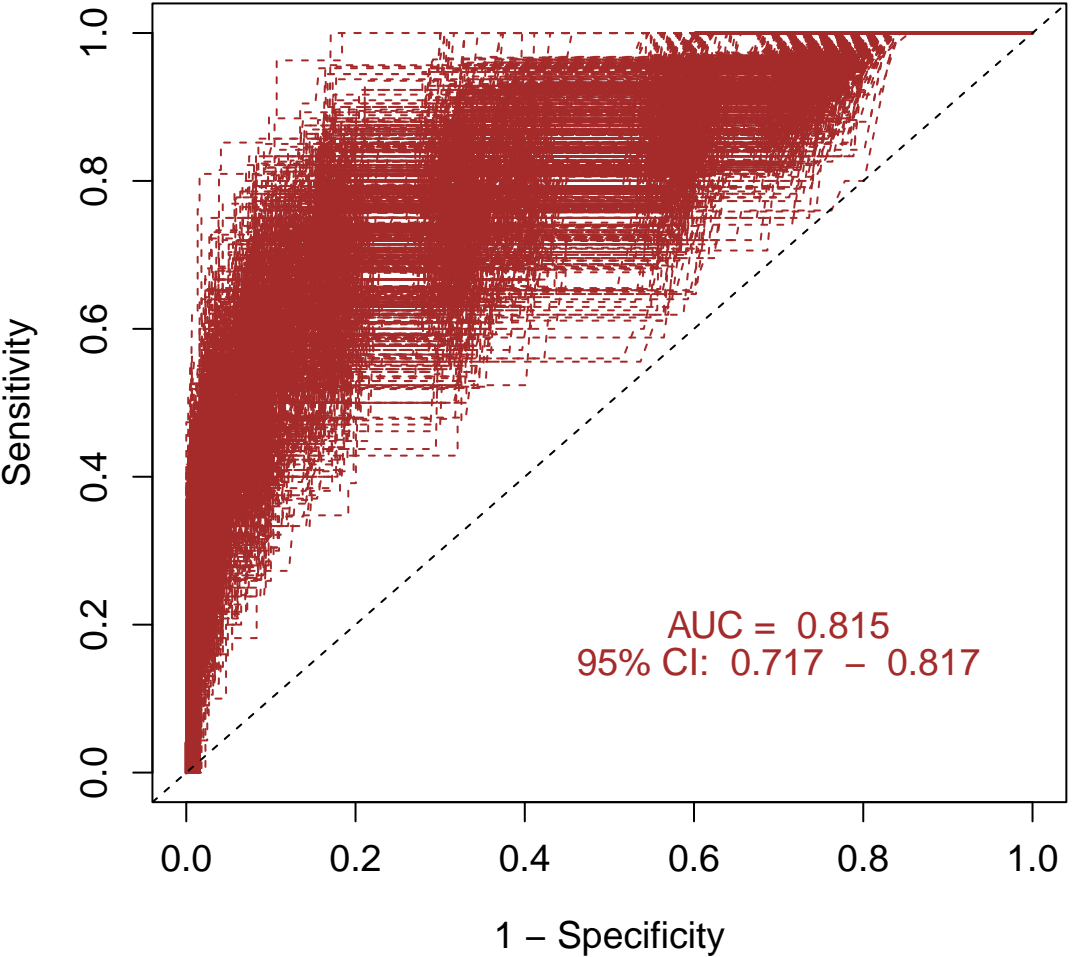

**Supplementary Table 1** Vital signs and treatments of PR patients, etc

| Adequate anesthesia | Gender | Age(years) | Consciousness | Pupillary reflex | HR(bpm) | BP      | SpO2 | R(bpm) | Chest wall thickness(mm) | Last CT scan time | PR recurrence time | Time interval | Treatments                                   |
|---------------------|--------|------------|---------------|------------------|---------|---------|------|--------|--------------------------|-------------------|--------------------|---------------|----------------------------------------------|
| Yes                 | Male   | 51         | Clear         | Isoconic/Present | 67      | 98/67   | 98%  | 20     | 20.34                    | 8:05              | 8:05               | <5min         | Oxygen 2L/min, 5% GS 50ml IV Drop            |
| Yes                 | Female | 35         | Clear         | Isoconic/Present | 68      | 101/60  | 92%  | 19     | 30.08                    | 8:00              | 8:00               | <5min         | Oxygen 2L/min, 5% GS 50ml IV Drop            |
| Yes                 | Female | 37         | Waste         | Isoconic/Present | 52      | 83/40   | 99%  | 18     | 21.83                    | 7:45              | 8:05               | >5min         | Oxygen 2L/min, 5% GS 50ml IV Drop            |
| Yes                 | Female | 52         | Clear         | Isoconic/Present | 69      | 60/42   | 98%  | 18     | 46.97                    | 7:51              | 8:00               | <5min         | Oxygen 2L/min, 5% GS 50ml IV Drop            |
| Yes                 | Female | 58         | Clear         | Isoconic/Present | 42      | 69/34   | 98%  | 16     | 37.67                    | 8:51              | 8:51               | <5min         | Oxygen 2L/min, 5% GS 50ml IV Drop            |
| Yes                 | Female | 33         | Clear         | Isoconic/Present | 54      | 67/37   | 100% | 22     | 16.60                    | 8:16              | 8:25               | >5min         | Oxygen 2L/min, 5% GS 50ml IV Drop            |
| Yes                 | Female | 33         | Clear         | Isoconic/Present | 54      | 58/35   | 99%  | 18     | 36.17                    | 8:13              | 8:15               | <5min         | Oxygen 2L/min, 5% GS 50ml IV Drop            |
| Yes                 | Female | 27         | Clear         | Isoconic/Present | 57      | 68/39   | 100% | 15     | 48.44                    | 8:14              | 8:20               | >5min         | Oxygen 2L/min, 5% GS 50ml IV Drop            |
| Yes                 | Female | 35         | Clear         | Isoconic/Present | 60      | 87/53   | 99%  | 18     | 48.48                    | 8:24              | 8:30               | >5min         | Oxygen 2L/min, 5% GS 50ml IV Drop            |
| Yes                 | Male   | 35         | Clear         | Isoconic/Present | 61      | 75/51   | 98%  | 20     | 45.45                    | 8:39              | 8:45               | >5min         | Oxygen 2L/min, 5% GS 50ml IV Drop            |
| Yes                 | Male   | 47         | Clear         | Isoconic/Present | 50      | 76/35   | 99%  | 15     | 34.36                    | 8:18              | 8:30               | >5min         | Oxygen 2L/min, 5% GS 50ml IV Drop            |
| No                  | Male   | 60         | Clear         | Isoconic/Present | 78      | 161/98  | 98%  | 15     | 28.55                    | 7:58              | 8:01               | <5min         | Oxygen 2L/min, 5mgDEX IV                     |
| No                  | Female | 60         | Clear         | Isoconic/Present | 80      | 70/59   | 90%  | 20     | 32.12                    | 8:25              | 8:40               | >5min         | Oxygen 2L/min, 5% GS 50ml IV Drop            |
| No                  | Female | 40         | Clear         | Isoconic/Present | 57      | 60/31   | 100% | 16     | 38.78                    | 8:25              | 8:30               | <5min         | Oxygen 2L/min, 5% GS 50ml IV Drop            |
| No                  | Female | 33         | Clear         | Isoconic/Present | 52      | 87/52   | 100% | 20     | 51.24                    | 7:55              | 7:55               | <5min         | Oxygen 2L/min, 5% GS 50ml IV Drop            |
| No                  | Female | 33         | Clear         | Isoconic/Present | 76      | 90/60   | 95%  | 16     | 39.55                    | 8:06              | 8:12               | >5min         | Oxygen 2L/min, 5% GS 50ml IV Drop            |
| No                  | Female | 43         | Clear         | Isoconic/Present | 69      | 69/32   | 95%  | 18     | 27.57                    | 7:57              | 8:00               | <5min         | Oxygen 2L/min, 5% GS 50ml IV Drop            |
| No                  | Female | 37         | Clear         | Isoconic/Present | 70      | 59/28   | 100% | 18     | 25.99                    | 8:19              | 8:25               | >5min         | Oxygen 2L/min, 5% GS 50ml IV Drop            |
| No                  | Female | 57         | Clear         | Isoconic/Present | 46      | 127/104 | 97%  | 18     | 36.87                    | 8:21              | 8:40               | >5min         | Oxygen 2L/min, 5% GS 50ml IV Drop            |
| No                  | Female | 48         | Clear         | Isoconic/Present | 56      | 92/72   | 99%  | 16     | 44.48                    | 8:26              | 8:45               | >5min         | Oxygen 2L/min, 5% GS 50ml IV Drop            |
| No                  | Male   | 55         | Clear         | Isoconic/Present | 44      | 54/13   | 98%  | 14     | 47.66                    | 8:32              | 8:35               | <5min         | Oxygen 2L/min, 5% GS 50ml IV Drop, 5mgDEX IV |
| No                  | Female | 54         | Clear         | Isoconic/Present | 54      | 88/54   | 94%  | 18     | 31.45                    | 8:24              | 8:30               | >5min         | Oxygen 2L/min, 5% GS 50ml IV Drop            |
| No                  | Female | 57         | Clear         | Isoconic/Present | 60      | 110/71  | 99%  | 18     | 53.61                    | 8:22              | 8:30               | >5min         | Oxygen 2L/min, 5% GS 50ml IV Drop            |
| No                  | Female | 56         | Clear         | Isoconic/Present | 63      | 110/70  | 96%  | 20     | 50.60                    | 7:56              | 8:05               | >5min         | Oxygen 2L/min, 5% GS 50ml IV Drop            |
| No                  | Female | 61         | Clear         | Isoconic/Present | 60      | 120/80  | 98%  | 20     | 35.55                    | 7:39              | 7:40               | <5min         | Oxygen 2L/min, 5% GS 50ml IV Drop            |

Abbreviations: PR, pleural reaction; HR, heart rate; BP, blood pressure; R, respiration; CT, Computed Tomography; GS, glucose solution; IV, intravenous injection; DEX, Dexamethasone.
